# Supplementary material
Source: PubMed Central journal article supplement (PMC545457)
Supplement: nar_32_22_6565__1.pdf [file nar_32_22_6565__1.pdf]

**Formation of 8-oxo-7,8-dihydroguanine-radicals in  $\gamma$ -  
irradiated DNA by multiple one-electron oxidations**

**By**

Lata I. Shukla, Amitava Adhikary<sup>a</sup>, Robert Pazdro and Michael D.  
Sevilla\*

Department of Chemistry  
Oakland University  
Rochester, MI 38309

<sup>a</sup>On leave from Department of Chemistry, Rajdhani College, University of Delhi, Raja  
Garden, Delhi – 110 015, India.

**Supplementary Material:**

**Figure S1**

**Figure S2**

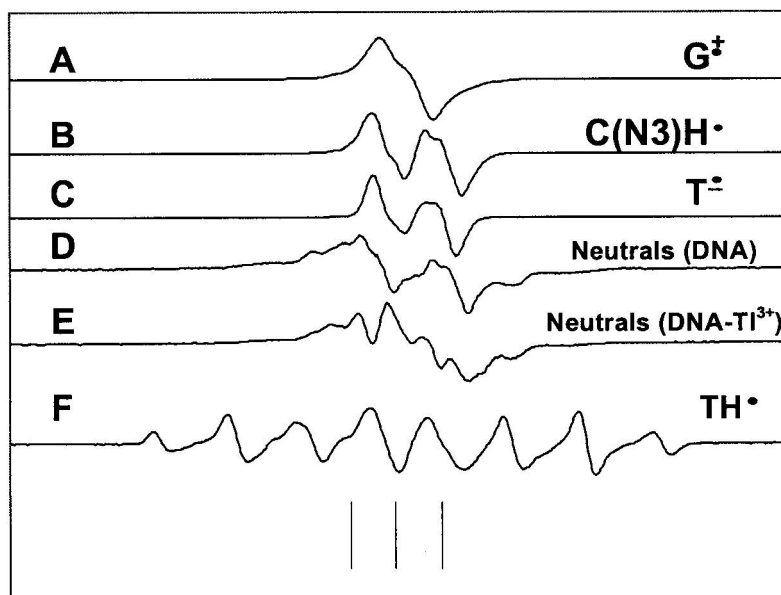

**Figure S1.** (A) The spectra of  $G^{\bullet+}$  was obtained by oxidation of dGMP by radiation produced  $Cl_2^{\bullet-}$  in 8 M LiCl in  $D_2O$  containing  $\{Fe(CN)_6\}^{3-}$  (39). (B) The spectra of the one electron adduct of cytosine  $C(N3H)^{\bullet}$  was obtained using an irradiated solution of 11 mg polydG · polydC in  $N_2$ -saturated  $D_2O$  solution by subtraction of  $G^{\bullet+}$  (39,40). (C) The spectra of  $T^{\bullet-}$  was obtained by electron attachment to dTMP in  $N_2$ -saturated  $D_2O$  solution of 8 M LiCl at 100K along with baseline zeroing (39). (D) The spectra of DNA neutral radicals were obtained in  $\gamma$ -irradiated (dose = 12kGy) hydrated-DNA ( $\Gamma = 12 \pm 2$  in  $D_2O$ /nucleotide) in the presence of electron and hole scavengers  $\{K_4Fe(CN)_6\}$  and  $\{K_3Fe(CN)_6\}$  at 77K in which residual  $G^{\bullet+}$  (15%) and  $C(N3H)^{\bullet}$  (21%) have been subtracted (Shukla, L. I., Pazdro, R., Becker, D. and Sevilla, M.D. (manuscript in preparation)). (E) The spectrum of neutral radicals were obtained in irradiated DNA- $Tl^{3+}$  samples (dose = 5.94 kGy) after subtraction of 54%  $G^{\bullet+}$ , and small amounts of  $T^{\bullet-}$  (5%) and  $C(N3H)^{\bullet}$  (7%) (F)  $TH^{\bullet}$  from irradiated-TMP in 10%  $H_2O$  / 90%  $D_2O$  (40-42). The three reference markers in this and in subsequent figures are Fremy's salt resonances (The central marker is at  $g = 2.0056$  and each of three markers is separated from one another by 13.09 G).

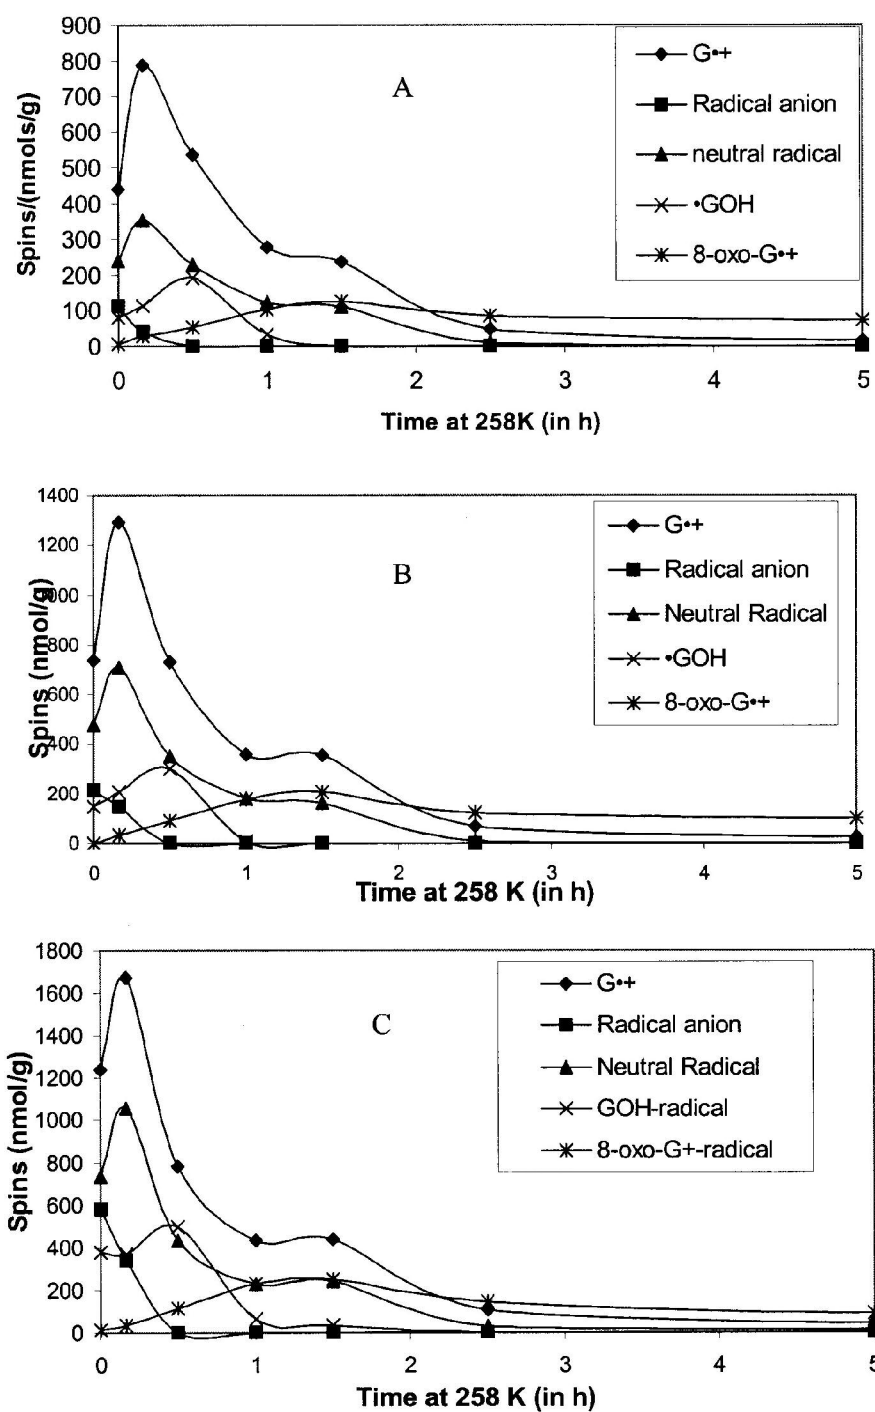

**Figure S2.** Variation of spins upon annealing for different time periods at 258K of DNA- $Tl^{3+}$  samples ( $Tl^{3+}$ , 1/20 bp) in  $D_2O$  at various irradiation doses (A) 4.75 kGy, (B) 9.5 kGy and (C) 19 kGy.
